# Supplementary material for: Male age: negative impact on sperm DNA fragmentation
Source: publisher site journal article supplement (doi:10.18632/aging.101946), 2019-05-14
Supplement: Supplementary file [file aging-v11i9-101946-supplementary-material-SD1.pdf]

## SUPPLEMENTARY MATERIAL

**Supplemental table. DFI of raw and DGC-treated semen.**

| SAMPLE ID                                                        | RAW SEMEN DFI (%) | PURESPERM® DGC DFI (%) | GRADIENT™ DGC DFI (%) |
|------------------------------------------------------------------|-------------------|------------------------|-----------------------|
| TREATED SEMEN DFI > RAW SEMEN DFI (RAW SEMEN DFI >30%)           |                   |                        |                       |
| 4                                                                | 32,97             | 35,27                  | 39,95                 |
| 7                                                                | 36,82             | 52,59                  | 60,99                 |
| 39                                                               | 50,38             | 64,88                  | 70,54                 |
| 84                                                               | 32,75             | 32,25                  | 34,51                 |
| TREATED SEMEN DFI > RAW SEMEN DFI (GRADIENT DGC > PURESPERM DGC) |                   |                        |                       |
| 13                                                               | 21,39             | 25,86                  | 31,12                 |
| 40                                                               | 9,9               | 10,33                  | 10,99                 |
| 49                                                               | 12,12             | 20,87                  | 21,92                 |
| 70                                                               | 10,12             | 10,22                  | 10,46                 |
| TREATED SEMEN DFI > RAW SEMEN DFI (PURESPERM DGC > GRADIENT DGC) |                   |                        |                       |
| 16                                                               | 23,41             | 34,19                  | 28,25                 |
| 21                                                               | 16,74             | 25,49                  | 24,73                 |
| 29                                                               | 16,13             | 40,84                  | 36,92                 |
| 33                                                               | 13,24             | 16,44                  | 16,31                 |
| 37                                                               | 21,61             | 35,14                  | 31,15                 |
| 50                                                               | 14,15             | 18,49                  | 14,35                 |
| 63                                                               | 12,64             | 17,12                  | 14,54                 |
| 77                                                               | 24,28             | 29,72                  | 26,15                 |
| 73                                                               | 11,31             | 13,92                  | 12,57                 |
| GRADIENT DGC DFI > RAW AND PURESPERM DGC DFI                     |                   |                        |                       |
| 9                                                                | 21,63             | 20,95                  | 26                    |
| 25                                                               | 17,68             | 16,48                  | 18,07                 |
| 41                                                               | 8,76              | 4,83                   | 10,11                 |
| 43                                                               | 13,32             | 7,31                   | 13,97                 |
| 52                                                               | 16,43             | 11,42                  | 21,84                 |
| 56                                                               | 19,36             | 11,53                  | 20,96                 |
| 59                                                               | 13,52             | 13,5                   | 14,39                 |
| 85                                                               | 8,41              | 7,83                   | 10,87                 |
| PURESPERM DGC DFI > RAW AND GRADIENT DGC DFI                     |                   |                        |                       |
| 34                                                               | 6,48              | 6,96                   | 5,73                  |
| 60                                                               | 6,79              | 7,24                   | 2,99                  |
| 64                                                               | 8,15              | 8,21                   | 7,11                  |
| 66                                                               | 12,47             | 12,82                  | 8,59                  |
| 78                                                               | 7,17              | 7,94                   | 5,91                  |

| SAMPLE ID | RAW SEMEN DFI (%) | PURESPERM® DGC DFI (%) | GRADIENT®™ DGC DFI (%) |
|-----------|-------------------|------------------------|------------------------|
|           |                   |                        |                        |

| TREATMENT IMPROVEMENT (RAW DFI > 30%) |       |       |       |
|---------------------------------------|-------|-------|-------|
| 26                                    | 38,12 | 24,83 | 35,9  |
| 54                                    | 61,75 | 44,27 | 50,86 |
| 69                                    | 34,21 | 14,75 | 14,58 |
| TREATMENT IMPROVEMENT (RAW DFI < 30%) |       |       |       |
| 1                                     | 16,02 | 8,97  | 8,68  |
| 2                                     | 7,87  | 4,15  | 6,84  |
| 3                                     | 21,13 | 18,25 | 18,86 |
| 5                                     | 14,37 | 8,04  | 9,24  |
| 6                                     | 16,75 | 12,46 | 11,29 |
| 8                                     | 23,31 | 12,15 | 18,45 |
| 10                                    | 15,45 | 10,28 | 8,09  |
| 11                                    | 14,03 | 7,06  | 6,67  |
| 12                                    | 10,06 | 5,18  | 7,89  |
| 14                                    | 6,61  | 3,67  | 3,97  |
| 15                                    | 22,09 | 3,22  | 3,56  |
| 17                                    | 11,22 | 8,16  | 8,9   |
| 18                                    | 11,22 | 8,53  | 6,75  |
| 19                                    | 10,68 | 6,41  | 4,2   |
| 20                                    | 23,61 | 13,85 | 15,17 |
| 22                                    | 20,16 | 5,87  | 8,44  |
| 23                                    | 11,41 | 9,58  | 9,56  |
| 24                                    | 14,07 | 7,41  | 9,05  |
| 27                                    | 9,93  | 8,33  | 8,16  |
| 28                                    | 10,71 | 1,61  | 2,55  |
| 30                                    | 16,8  | 12,62 | 13,46 |
| 31                                    | 11,31 | 7,84  | 9,1   |
| 32                                    | 15,59 | 11,52 | 11,66 |
| 35                                    | 10,36 | 8,48  | 9,78  |
| 36                                    | 24,2  | 15,88 | 20,94 |
| 38                                    | 13,43 | 8,78  | 10,52 |
| 42                                    | 10,6  | 8,29  | 9,84  |
| 44                                    | 5,9   | 2,49  | 1,67  |
| 45                                    | 5,5   | 1,33  | 2,2   |
| 46                                    | 10,61 | 10,56 | 8,73  |
| 47                                    | 11,86 | 4,61  | 7,97  |
| 48                                    | 4,2   | 3,4   | 2,95  |
| 51                                    | 15,73 | 11,15 | 9,98  |
| 53                                    | 16,02 | 13,57 | 14,76 |
| 55                                    | 13,53 | 6,2   | 6,37  |
| 57                                    | 9,23  | 2,06  | 1,31  |
| 58                                    | 15,2  | 7,48  | 8,67  |
| 61                                    | 10,41 | 6,23  | 9,49  |
| 62                                    | 10,74 | 7,51  | 6,58  |
| 65                                    | 13,54 | 12,4  | 12,12 |
| 67                                    | 10,8  | 6,26  | 5,01  |
| 68                                    | 10,77 | 7,53  | 4,23  |
| 71                                    | 11,59 | 3,97  | 4,98  |
| 72                                    | 10,76 | 9,38  | 9,2   |
| 74                                    | 13,6  | 6,94  | 7,11  |

|    |       |       |       |
|----|-------|-------|-------|
| 75 | 19,43 | 16,11 | 17,56 |
| 76 | 15,63 | 7,88  | 11,99 |
| 79 | 11,48 | 6,2   | 4,29  |
| 80 | 8,75  | 3,9   | 3,52  |
| 81 | 16,06 | 11,01 | 11,34 |
| 82 | 23,8  | 9,04  | 14,16 |
| 83 | 13,18 | 11,31 | 8,31  |
| 86 | 10,68 | 5,65  | 6,95  |
| 87 | 7,4   | 6,79  | 5,04  |
| 88 | 16,43 | 9,95  | 7,26  |
| 89 | 3,43  | 2,75  | 2,72  |

Table listed DFI values (%) before and after DGC treatments of all semen samples analyzed. DFI were grouped according to the indicated parameters.
